# Supplementary material for: Morphological grounds for the obligate aerial respiration of an aquatic snail: functional and evolutionary perspectives
Source: PeerJ journal article supplement (doi:10.7717/peerj.10763), 2021-04-14

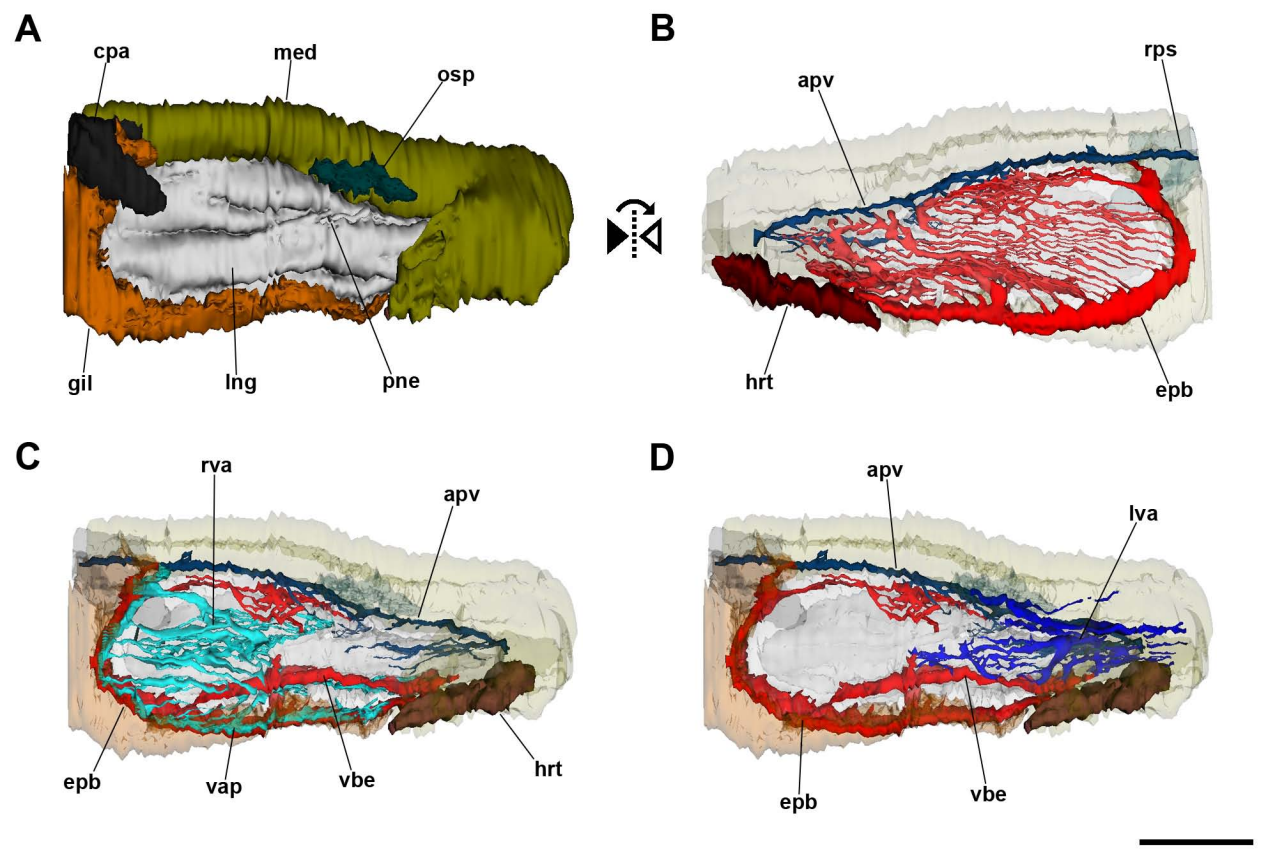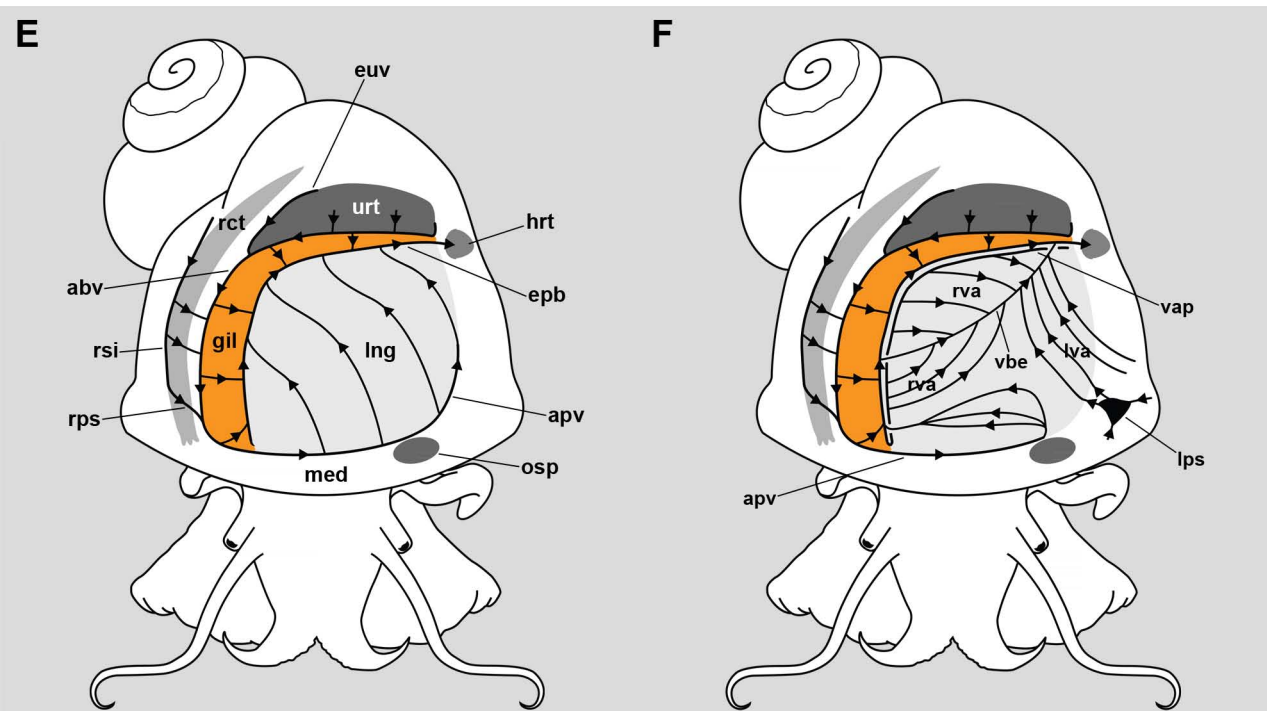

Supplement: Figure_S1.pdf [file Figure_S1.pdf]
